# Supplementary material for: Investigation of a 2D WS2 nanosheet-reinforced tough DNA hydrogel as a biomedical scaffold: preparation and in vitro characterization
Source: Royal Society of Chemistry journal article supplement (doi:10.1039/d1ma00897h), 2021-11-30
Supplement: d1ma00897h1.pdf [file d1ma00897h1.pdf]

## Electronic Supplementary Information

# Investigation of 2D WS<sub>2</sub> nanosheet-reinforced tough DNA hydrogel as a biomedical scaffold: preparation and *in vitro* characterization

Sayantani Basu,<sup>a</sup> Aishik Chakraborty,<sup>b†</sup> Abdul-Rahman Imad Alkiswaani,<sup>c†</sup> Yasmeen Shamiya,<sup>d</sup> and Arghya Paul<sup>e\*</sup>

## 1. Materials and Methods

### 1.1 Preparation and characterization of WS<sub>2</sub>-Alg nanosheets

2D WS<sub>2</sub>-Alg nanosheets were prepared based on a standard TMD exfoliation protocol with minor modifications <sup>1</sup>. A 1% w/v sodium alginate (PROTANAL LF20/40, FMC BioPolymer, Philadelphia, PA) solution was prepared through vigorous agitation in MilliQ water. Three different concentrations of tungsten disulfide (Sigma-Aldrich, powder, 2 μm, 99%) at 0.5%, 1%, and 2% w/v respectively, were dispersed in the alginate solution through vortexing for 30 seconds. This WS<sub>2</sub> dispersion was subsequently sonicated in an ice bath by an ultrasonic liquid processor with a probe tip (SONICATOR XL2020, Misonix Incorporated, Farmingdale, NY) at an amplitude setting of five for 5 hours to allow for exfoliation of suspended WS<sub>2</sub> into 2D-nanosheets. The resulting 2D WS<sub>2</sub>-Alg nanosheets were characterized using Transmission Electron Microscopy (Phillips) and UV-Vis Spectroscopy (Beckman Coulter).

### 1.2 Fabrication of single and double network DNA-based hydrogels

The covalently crosslinked DNA network was generated following a previously published protocol <sup>2</sup>. DNA sodium salt from salmon testes (Sigma-Aldrich,  $M_n \approx 1.3 \times 10^6$  Da, ca. 2000 bp) was solubilized overnight in MilliQ water at 37 °C. To form the single

network (SN) nanocomposite hydrogels, exfoliated WS<sub>2</sub> was added into the DNA solution and stirred for 5 minutes, followed by the addition of the cross-linker, poly ethylene glycol diepoxide (PEGDE - Sigma-Aldrich,  $M_n = 500$ ) and TEMED (044% w/v) (tetramethylethylenediamine, Bio-Rad Laboratories Inc.) to initiate the gelation. TEMED induces denaturation of DNA to expose the amine groups on the

<sup>a</sup> Department of Chemical and Petroleum Engineering, School of Engineering, University of Kansas, Lawrence, Kansas 66045, United States Department of Biomedical Engineering, University of Rochester, Rochester, New York 14627, USA

<sup>b</sup> Department of Chemical and Biochemical Engineering, The University of Western Ontario, London, Ontario N6A 5B9, Canada

<sup>c</sup> School of Medicine, University of Kansas Medical Centre, Kansas City, Kansas 66160, USA

<sup>d</sup> Department of Chemistry, The University of Western Ontario, London, ON N6A 5B9, Canada

<sup>e</sup> Department of Chemical and Biochemical Engineering, Department of Chemistry, School of Biomedical Engineering, The Centre for Advanced Materials and Biomaterials Research, The University of Western Ontario, London, ON N6A 5B9, Canada

E-mail: [arghya.paul@uwo.ca](mailto:arghya.paul@uwo.ca)

\* Corresponding author

† Equal contribution

## Electronic Supplementary Information

nucleobases for further reaction with the epoxide end groups of PEGDE<sup>2-4</sup>. The final concentration of DNA was fixed at 5% w/v and a DNA/PEGDE mass ratio of 2 was used for all the hydrogels. Thereafter, the reaction mixture was placed in a bead bath at 55 °C for 4 hours to form the cross-linked network and the cross-linked gels were allowed to cool overnight. The final concentration of WS<sub>2</sub> in the resultant hydrogels were 0.1875%, 0.375% and 0.75% w/v. These hydrogels with three different WS<sub>2</sub> concentrations were named as “Low”, “Med”, and “High” respectively. To form the double-network (DN) hydrogels, the gels were soaked in a 0.025(M) CaCl<sub>2</sub> (96%, anhydrous, ACROS Organics, NJ, USA) solution and placed for 24 hours in an incubator shaker at 37°C.

### 1.3 Mechanical Characterization

Rheological studies were conducted using an AR2000 rheometer (TA Instruments, New Castle, DE) with a 20 mm rough parallel plate and plate geometry. An established protocol was used to collect and analyze data,<sup>2</sup>. The SN gels were soaked in PBS for 24 h prior to testing, while the DN gels were soaked in the CaCl<sub>2</sub> solution for 24 h to form the second network and subsequently washed with PBS prior to analysis. All the experiments were performed at 37 °C. Strain sweeps were first carried out within strain values from 0.001 to 100 at a fixed frequency of 1 Hz for the detection of the linear viscoelastic region. Having found a constant strain of 0.01 to be within the linear region, oscillatory frequency sweeps at this fixed strain within a frequency range of 0.01 – 10 Hz were conducted. Furthermore, stress sweeps at 1 Hz were carried out by varying the shear stress from 0.1 – 10,000 Pa. Finally, uniaxial compression tests were conducted with a TA ARES RSA3 rheometer (TA Instruments, New Castle, DE), where 5 mm biopsy punches were utilized to obtain cylindrical samples. The compressive moduli of the hydrogel constructs were obtained from the linear regimes of the stress-strain plots in the range of 10 to 20% strain.

### 1.4 Physical and morphological characterization

The hydration capacity of the hydrogel constructs was determined via swelling studies<sup>2</sup>, whereby the samples were freeze-dried to obtain their dry mass ( $M_0$ ) and subsequently soaked in PBS. The increase in the mass of the hydrogels was measured in 5-minute intervals for the first 15 minutes, in 15-minute intervals up to the 2-hour timepoint, and every hour thereafter for a total of 8 hours. The swelling ratio was calculated as the ratio of the mass gain to the initial dry mass as represented by the following equation,

$$\text{swelling ratio} = \frac{M_t - M_0}{M_0}$$

## Electronic Supplementary Information

where,  $M_t$  is the mass evaluated at the aforementioned time points and  $M_0$  is the mass of the dry hydrogel.

The morphology of the single and double network hydrogels was visualized by performing scanning electron microscopy with the freeze-dried hydrogels after sputter coating the samples with gold<sup>[22]</sup>. An immersion-lens detector (FEI Tecnai F20 XT) with an acceleration voltage of 1 - 10 kV was used for acquiring the images.

### 1.5 Evaluation of *in vitro* biocompatibility

Human adipose-derived stem cells (hASCs, RoosterBio, USA) were grown with  $\alpha$ -minimum essential medium (Invitrogen), 10% fetal bovine serum (Thermo-Fischer Scientific, USA), and 1% penicillin/streptomycin, following manufacturer's protocol. The *in vitro* biocompatibility assays were performed following a previously established protocol<sup>2</sup>. The hASCs were grown in 24 well plates. The DNA hydrogels were positioned inside cell culture inserts (Corning Incorporated-Life Sciences, 3  $\mu$ m diameter of the pore) and placed on top of the wells. With this setup, the cells were exposed to diffused hydrogel debris. This non-contact method of testing cytotoxicity of hydrogels avoids cell apoptosis in adherent cell cultures arising from weight-induced mechanical stress<sup>5</sup>. In direct-contact methods, an overestimation of cytotoxicity may happen because of apoptosis from the gels smothering the adherent cells. Furthermore, cell-culture inserts are frequently used to evaluate drug delivery-based scaffolds, where the gels release the entrapped therapeutic materials as a function of time. Next, MTS assays were performed, following manufacturer's protocol, after 24h and 72h of incubation with the hydrogels. Finally, live/dead assays were conducted, following previously established protocol<sup>6</sup>, to image the cells after 24h and 72h.

### 1.6 Statistical Analysis

Statistical significance was obtained by performing one-way analysis of variance (ANOVA) followed by Tukey's post-hoc test. All statistical analyses were performed using Microsoft Excel. Statistically relevant p value was displayed as \*= p<0.05, \*\*= p<0.01, and \*\*\*= p<0.001.

## 2. References

- 1 M. Sahu, L. Narashimhan, O. Prakash and A. M. Raichur, *ACS Appl. Mater. Interfaces*, 2017, **9**, 14347–14357.
- 2 S. Basu, R. Johl, S. Pacelli, S. Gehrke and A. Paul, *ACS Macro Lett.*, 2020, **9**, 1230–1236.
- 3 S. Basu, A. R. Alkiswaani, S. Pacelli and A. Paul, *ACS Appl. Mater. Interfaces*, 2019, **11**, 34621–34633.

## Electronic Supplementary Information

- 4 F. Topuz and O. Okay, *Biomacromolecules*, 2009, **10**, 2652–2661.
- 5 M. Kempf, R. M. Kimble and L. Cuttle, *Burns*, 2011, **37**, 994–1000.
- 6 A. Paul, V. Manoharan, D. Krafft, A. Assmann, J. A. Uquillas, S. R. Shin, A. Hasan, M. A. Hussain, A. Memic, A. K. Gaharwar and A. Khademhosseini, *J. Mater. Chem. B*, 2016, **4**, 3544–3554.
